# Supplementary material
Source: PubMed Central journal article supplement (PMC3553687)
Supplement: AAC.01783-12_zac999101590so1.pdf [file AAC.01783-12_zac999101590so1.pdf]

**TABLE S1.** Phenotypic resistance characteristics of the isolates

| Isolate | Inhibition zone diameter (mm) <sup>a, b</sup> |     |     |     | Minimum inhibitory concentration (mg/L) <sup>a, c</sup> |     |      |       |       |     |     |     |     |
|---------|-----------------------------------------------|-----|-----|-----|---------------------------------------------------------|-----|------|-------|-------|-----|-----|-----|-----|
|         | IPM                                           | AMK | GEN | SXT | IPM                                                     | MEM | AMK  | GEN   | TOB   | CIP | SXT | CST | TGC |
| K51-65  | 8                                             | 6   | 6   | 6   | >32                                                     | >32 | >256 | >1024 | >1024 | >32 | >32 | 0,5 | 4   |
| K51-66  | 9                                             | 6   | 6   | 6   | >32                                                     | >32 | >256 | >1024 | >1024 | >32 | >32 | 1   | 4   |
| K51-67  | 10                                            | 21  | 9   | 6   | >32                                                     | ≥32 | 4    | 32    | 2     | 1   | 2   | 1   | 2   |
| K51-68  | 6                                             | 6   | 6   | 6   | >32                                                     | >32 | >256 | >1024 | >1024 | >32 | >32 | 1   | 4   |
| K51-69  | 6                                             | 6   | 6   | 6   | ND                                                      | ND  | ND   | ND    | ND    | ND  | ND  | ND  | ND  |
| K51-70  | 6                                             | 6   | 6   | 6   | >32                                                     | >32 | >256 | >1024 | >1024 | >32 | >32 | 0,5 | 4   |
| K51-71  | 6                                             | 6   | 6   | 6   | ND                                                      | ND  | ND   | ND    | ND    | ND  | ND  | ND  | ND  |
| K51-72  | 13                                            | 6   | 6   | 6   | >32                                                     | 32  | >256 | >1024 | >1024 | >32 | >32 | 1   | 4   |
| K51-73  | 13                                            | 6   | 6   | 6   | ND                                                      | ND  | ND   | ND    | ND    | ND  | ND  | ND  | ND  |
| K51-74  | 12                                            | 6   | 6   | 6   | ND                                                      | ND  | ND   | ND    | ND    | ND  | ND  | ND  | ND  |
| K51-75  | 6                                             | 6   | 6   | 6   | ND                                                      | ND  | ND   | ND    | ND    | ND  | ND  | ND  | ND  |
| K51-76  | 6                                             | 6   | 6   | 6   | ND                                                      | ND  | ND   | ND    | ND    | ND  | ND  | ND  | ND  |
| K51-77  | 10                                            | 6   | 6   | 6   | >32                                                     | >32 | >256 | >1024 | >1024 | >32 | >32 | 0,5 | 4   |
| K51-78  | 9                                             | 6   | 6   | 6   | >32                                                     | 32  | >256 | >1024 | >1024 | >32 | >32 | 0,5 | 8   |
| K51-79  | 11                                            | 6   | 6   | 6   | >32                                                     | >32 | >256 | >1024 | >1024 | >32 | >32 | 0,5 | 4   |
| K51-80  | 10                                            | 6   | 6   | 6   | ND                                                      | ND  | ND   | ND    | ND    | ND  | ND  | ND  | ND  |
| K51-81  | 9                                             | 6   | 6   | 6   | 32                                                      | 32  | >256 | >1024 | >1024 | >32 | >32 | 0,5 | 4   |
| K70-64  | 9                                             | 6   | 6   | 6   | >32                                                     | >32 | >256 | >1024 | >1024 | >32 | >32 | 0,5 | 4   |
| K70-65  | 9                                             | 6   | 6   | 6   | ND                                                      | ND  | ND   | ND    | ND    | ND  | ND  | ND  | ND  |
| K70-66  | 12                                            | 29  | 17  | 6   | ND                                                      | ND  | ND   | ND    | ND    | ND  | ND  | ND  | ND  |
| K70-67  | 11                                            | 6   | 6   | 6   | ND                                                      | ND  | ND   | ND    | ND    | ND  | ND  | ND  | ND  |
| K70-68  | 10                                            | 28  | 16  | 6   | ND                                                      | ND  | ND   | ND    | ND    | ND  | ND  | ND  | ND  |
| K70-69  | 13                                            | 28  | 24  | 6   | ≥32                                                     | 16  | 1    | 2     | 0,25  | >32 | >32 | 0,5 | 4   |
| K70-70  | 10                                            | 6   | 6   | 6   | >32                                                     | >32 | >256 | >1024 | >1024 | >32 | >32 | 0,5 | 4   |
| K70-71  | 13                                            | 30  | 17  | 6   | ND                                                      | ND  | ND   | ND    | ND    | ND  | ND  | ND  | ND  |
| K70-72  | 13                                            | 29  | 15  | 6   | ND                                                      | ND  | ND   | ND    | ND    | ND  | ND  | ND  | ND  |
| K70-73  | 12                                            | 29  | 18  | 6   | ND                                                      | ND  | ND   | ND    | ND    | ND  | ND  | ND  | ND  |
| K70-74  | 13                                            | 29  | 17  | 6   | >32                                                     | >32 | 1    | 12    | 0,5   | >32 | >32 | 0,5 | 8   |
| K70-75  | 15                                            | 30  | 18  | 6   | ND                                                      | ND  | ND   | ND    | ND    | ND  | ND  | ND  | ND  |
| K70-76  | 14                                            | 30  | 15  | 6   | 16                                                      | 16  | 1    | 12    | 0,5   | >32 | >32 | 0,5 | 4   |
| K70-77  | 7                                             | 6   | 6   | 6   | ND                                                      | ND  | ND   | ND    | ND    | ND  | ND  | ND  | ND  |
| K70-78  | 6                                             | 6   | 6   | 6   | ND                                                      | ND  | ND   | ND    | ND    | ND  | ND  | ND  | ND  |
| K70-79  | 6                                             | 6   | 6   | 6   | ND                                                      | ND  | ND   | ND    | ND    | ND  | ND  | ND  | ND  |
| K70-80  | 10                                            | 6   | 6   | 6   | ND                                                      | ND  | ND   | ND    | ND    | ND  | ND  | ND  | ND  |
| K70-81  | 8                                             | 25  | 6   | 6   | ND                                                      | ND  | ND   | ND    | ND    | ND  | ND  | ND  | ND  |

<sup>a</sup> IPM, imipenem; AMK, amikacin; GEN, gentamicin; SXT, trimethoprim/sulfamethoxazole; MEM, meropenem; TOB, tobramycin; CIP, ciprofloxacin; CST, colistin; TGC, tigecycline; ND, not determined.

<sup>b</sup> Determined by agar disc diffusion.

<sup>c</sup> Determined by Etest.

**TABLE S2.** Primers used for molecular detection and characterization of the class 1 integron and AbaR resistance islands.

| Primer <sup>a</sup> | Sequence 5'-3'           | Target site            | Reference                    |
|---------------------|--------------------------|------------------------|------------------------------|
| 5'CS (F)            | GCCTGTTTCGGTTCGTAAGCT    | 5'CS                   | Toleman <i>et al.</i> , 2007 |
| aac(6')-Ib-F (F)    | TTGCGATGCTCTATGAGTGGCTA  | <i>aacA4</i>           | Karah <i>et al.</i> , 2011   |
| aac(6')-Ib-R (R)    | CTCGAATGCCTGGCGTGTTT     | <i>aacA4</i>           | Karah <i>et al.</i> , 2011   |
| catB8-R (R)         | GCACCGTCTCCAATTTTGAT     | <i>catB8</i>           | Karah <i>et al.</i> , 2011   |
| catB8-F2 (F)        | AGATGGAGTGGTGGAACTGG     | <i>catB8</i>           | Karah <i>et al.</i> , 2011   |
| aadA1-F (F)         | CGCCGAAGTATCGACTCAAC     | <i>aadA1</i>           | Karah <i>et al.</i> , 2011   |
| aadA1-FR (R)        | GATGACGCCAACTACCTCTG     | <i>aadA1</i>           | Karah <i>et al.</i> , 2011   |
| aadA1-F2 (F)        | TATCCAGCTAAGCGCGAACT     | <i>aadA1</i>           | Karah <i>et al.</i> , 2011   |
| aadA1-R (R)         | GACTACCTTGGTGATCTCGC     | <i>aadA1</i>           | Karah <i>et al.</i> , 2011   |
| 3'CS (R)            | CGGATGTTGCGGATCTTCG      | 3'CS                   | Toleman <i>et al.</i> , 2007 |
| comM-1 (F)          | CAACCCTGTCTTTGCAATTTG    | <i>comM</i>            | This study                   |
| Tn6022a-1 (R)       | GGGTCGATTCAAACCAAATG     | <i>tniC</i>            | This study                   |
| Tn6022a-2 (F)       | CCATCGTTTTGCTGCTGATA     | <i>tniC</i>            | This study                   |
| Tn6022a-3 (R)       | AGCAATCTGCCAAGCTTCAT     | <i>tniA</i>            | This study                   |
| Tn6022a-4 (F)       | CGAGTTGGACAACCTGAAAAA    | <i>tniA</i>            | This study                   |
| Tn6022a-5 (F)       | GCAGCGTGGGACTTATGATT     | <i>tniA</i>            | This study                   |
| Tn6022a-6 (R)       | CCATTTAACGATTGGGGATG     | <i>tniA</i>            | This study                   |
| Tn6022a-7 (F)       | CTCCAGCAAAAAGCCAATGTT    | <i>tniB</i>            | This study                   |
| Tn6022a-8 (R)       | TGCCTCACGAGTACCAACAC     | <i>tniB</i>            | This study                   |
| Tn6022a-9 (F)       | AGATGCCGAAAGATTCGATG     | <i>tniD</i>            | This study                   |
| Tn6022a-10 (R)      | GCCACATGTCGTACAGATCG     | <i>tniD</i>            | This study                   |
| Tn6022a-11 (F)      | CATGGATGCAACCAGTCTGT     | <i>tniE</i>            | This study                   |
| Tn6022a-12 (R)      | TCGCATAAATCAGCACAACC     | <i>tniE</i>            | This study                   |
| Tn6022a-13 (F)      | AATACGTTACGCGAGTTGG      | <i>tniE</i>            | This study                   |
| Tn6022a-14 (R)      | TTGCCCATTAAGCACAACAG     | <i>tniE</i>            | This study                   |
| Tn6022a-15 (F)      | TCTTTTTGTTCTTGAGCTTGCTT  | <i>orf3</i>            | This study                   |
| Tn6022a-16 (R)      | AGGCGATTGCCTTAATGTGA     | <i>orf3/uspA</i>       | This study                   |
| Tn6022a-17 (F)      | CCCAAGAGAGCTGATTTTGC     | <i>uspA</i>            | This study                   |
| Tn6022a-18 (R)      | CAAAAGCAAAAAGCACCACAA    | <i>uspA</i>            | This study                   |
| Tn6022a-19 (F)      | TCGACTTCTGTTCCCTTCACG    | <i>sup</i>             | This study                   |
| Tn6022a-20 (F)      | CCTTGCCCTTACATTCTCG      | <i>sup</i>             | This study                   |
| Tn6022a-21 (R)      | CGGATACGCTTCCAATTTTC     | <i>sup</i>             | This study                   |
| Tn6022a-22 (F)      | GGATCAACGCCTGCAATAAT     | <i>sup</i>             | This study                   |
| Tn6022a-23 (R)      | GAAAATGCCAAGGGAATAAAAA   | <i>orf4</i>            | This study                   |
| Tn6022a-24 (F)      | AAAAGCTTTGTGGGATGTGG     | <i>orf4</i>            | This study                   |
| Tn6022a-25 (R)      | AAAATCAGAAAGCCATATGAAGAT | <i>orf4</i>            | This study                   |
| Z1-1 (F)            | AAGGTGCTTACCGAATGCAA     | <i>orf1-Z1</i>         | This study                   |
| Z1-2 (R)            | ACGAGAAAGCGAAGAAGTGG     | <i>orf1-Z1</i>         | This study                   |
| Z1-3 (F)            | CGTGGCATAACCATCATCAAG    | <i>orf2-Z1</i>         | This study                   |
| Z1-4 (R)            | GCGGATGAAGTGATGGAGTT     | <i>orf3-Z1</i>         | This study                   |
| Z1-5 (F)            | TTATTTAACGCCGAGCATC      | <i>orf3-Z1</i>         | This study                   |
| Z1-6 (R)            | GCTGCGGTAGCTGGTAATTC     | <i>orf3-Z1</i>         | This study                   |
| Z1-7 (F)            | TTCAGCCCATTCTGAGCTT      | <i>orf3-Z1</i>         | This study                   |
| Z1-8 (R)            | CTGGTGGTAATGGAGCTGGT     | <i>orf3-Z1</i>         | This study                   |
| Z1-9 (F)            | TTTGAACGACCATCAAGCAC     | <i>int-Z1</i>          | This study                   |
| Z1-10 (R)           | TACTATGGCCAGCATTTC       | <i>int-Z1</i>          | This study                   |
| Z1-11 (F)           | TTGTTCAAGCTAACGCGCTA     | <i>orf6-Z1</i>         | This study                   |
| Z1-12 (R)           | GGCCAAAAGGATGTGGAGTA     | <i>orf6-Z1/orf7-Z1</i> | This study                   |
| Tn6022b (R)         | ACCTGTTCTGCTGTCGTCT      | <i>tniAb</i>           | This study                   |
| Z2-1 (F)            | GCGAAATCATCTGCCAAACT     | <i>sul2</i>            | This study                   |
| Z2-2 (R)            | CTTTGCCACGAATACCGTCT     | <i>glmM</i>            | This study                   |
| Z2-3 (F)            | TGCCCTCTGGGTTATCAAG      | <i>rcr2/tetA</i>       | This study                   |
| ISAbal-out (R)      | GCGCTTGACAGACCCTAGAC     | <i>ISAbal</i>          | This study                   |

|                   |                         |                                   |                               |
|-------------------|-------------------------|-----------------------------------|-------------------------------|
| ISAbalB (F)       | CATGTAAACCAATGCTCACC    | <i>ISAbal</i>                     | Poirel & Nordmann, 2006       |
| ISAbalA (R)       | GTGCTTTGCGCTCATCATGC    | <i>ISAbal</i>                     | Poirel & Nordmann, 2006       |
| Tn2006-1 (F)      | TTGGCTCAACTTTATGATCCTG  | <i>yeeA</i>                       | This study                    |
| Tn2006-2 (R)      | ATGGGCTTCGTCATTCATTG    | ATPase                            | This study                    |
| OXA-23-like-R (F) | ATTTCTGACCGCATTTCAT     | <i>bla</i> <sub>OXA-23-like</sub> | Woodford <i>et al.</i> , 2006 |
| OXA-23-like-F (R) | GATCGGATTGGAGAACCAGA    | <i>bla</i> <sub>OXA-23-like</sub> | Woodford <i>et al.</i> , 2006 |
| Z2-4 (F)          | TAATCCAAATCCAGCCATCC    | <i>tetA</i>                       | This study                    |
| Z2-5 (R)          | TTTTATTAGCGGGTCTTGG     | <i>tetA</i>                       | This study                    |
| Z2-6 (F)          | CTCCTGTGATCCCTGAAAGC    | <i>tetA</i>                       | This study                    |
| Z2-7 (R)          | GGCGAGTTTACGGGTGTTA     | <i>tetR</i>                       | This study                    |
| Z2-8 (F)          | TGCAGAGCCAGCCTTCTTAT    | <i>tetR</i>                       | This study                    |
| Z2-9 (R)          | ATCAAAAATGCTGCGTTCACA   | <i>tetR/rcr2</i>                  | This study                    |
| Z2-10 (F)         | CTGTTTTCGACATCCCGTTC    | <i>rcr2</i>                       | This study                    |
| Z2-11 (R)         | CACTWCCACATGCTGTKKC     | <i>rcr2</i>                       | This study                    |
| Z2-12 (R)         | CCCTGGGAACACATCAATCT    | <i>rcr2/strB</i>                  | This study                    |
| Z2-13 (F)         | CATTGCTCATCATTTGATCGGCT | <i>strB</i>                       | This study                    |
| Z2-14 (R)         | TATCTGCGATTGGACCCTCTG   | <i>strA</i>                       | This study                    |
| Z2-15 (F)         | AATTGCCGTTATCACCAAGC    | <i>strA</i>                       | This study                    |
| orf4b (R)         | TGGACGCTACGTTGTGAAAG    | <i>orf4b</i>                      | This study                    |
| comM-2 (R)        | GCCAGCAAGCTCAGCATAA     | <i>comM</i>                       | This study                    |

<sup>a</sup> F, forward; R, reverse; Z1, zone 1; Z2, zone 2.

#### References for Table S2

- Karah N, Haldorsen B, Hermansen NO, Tveten Y, Ragnhildstveit E, Skutlaberg DH, Tofteland S, Sundsfjord A, Samuelsen O. 2011.** Emergence of OXA-carbapenemase- and 16S rRNA methylase-producing international clones of *Acinetobacter baumannii* in Norway. *J. Med. Microbiol.* **60**:515-521.
- Poirel L, Nordmann P. 2006.** Genetic structures at the origin of acquisition and expression of the carbapenem-hydrolyzing oxacillinase gene *bla*<sub>OXA-58</sub> in *Acinetobacter baumannii*. *Antimicrob. Agents Chemother.* **50**:1442-1448.
- Toleman MA, Vinodh H, Sekar U, Kamat V, Walsh TR. 2007.** *bla*<sub>VIM-2</sub> harboring integrons isolated in India, Russia, and the United States arise from an ancestral class 1 integron predating the formation of the 3' conserved sequence. *Antimicrob. Agents Chemother.* **51**:2636-2638.
- Woodford N, Ellington MJ, Coelho JM, Turton JF, Ward ME, Brown S, Amyes SGB, Livermore D.M. 2006.** Multiplex PCR for genes encoding prevalent OXA carbapenemases in *Acinetobacter* spp. *Int. J. Antimicrob. Agents.* **27**:351-353.

**TABLE S3.** PCR assays used for sequencing and detection of *aacA4-catB8-aadA1* and AbaR25.

| <b>PCR<sup>a</sup></b> | <b>Primers forward/reverse</b> | <b>Amplicon size (base pair)</b> | <b>Application</b>                               |
|------------------------|--------------------------------|----------------------------------|--------------------------------------------------|
| S1                     | 5'CS/3'CS                      | 2636                             | Sequencing of <i>aacA4-catB8-aadA1</i> in K51-65 |
| L1                     | comM-1/Z1-4                    | 11731                            | Sequencing of AbaR25 in K51-65                   |
| L2                     | Z1-3/Z2-2                      | 10262                            |                                                  |
| L3                     | Z2-1/Tn2006-2                  | 13148                            |                                                  |
| L4                     | Tn2006-1/comM-2                | 14597                            |                                                  |
| L5                     | comM-1/Tn2006-2                | 12761                            | Sequencing of AbaR4 in K51-67                    |
| L4                     | Tn2006-1/comM-2                | 6115                             |                                                  |
| L1                     | comM-1/Z1-4                    | 11731                            | Sequencing of $\Delta$ AbaR25 in K51-74          |
| L6                     | Z1-3/Tn2006-2                  | 17267                            |                                                  |
| L4                     | Tn2006-1/comM-2                | 14597                            |                                                  |
| S1                     | 5'CS/3'CS                      | 2636                             | Detection of <i>aacA4-catB8-aadA1</i>            |
| S2                     | 5'CS/aadA1-FR                  | 1683                             |                                                  |
| S3                     | 5'CS/catB8-R                   | 1337                             |                                                  |
| S4                     | 5'CS/aac(6')-Ib-R              | 820                              |                                                  |
| S5                     | comM-1/comM-2                  | 850                              | Detection of AbaR25                              |
| S6                     | comM-1/Tn6022a-6               | 2589                             |                                                  |
| S7                     | comM-1/Tn6022a-16              | 4717                             |                                                  |
| S8                     | Tn6022a-15/Tn6022a-25          | 4281                             |                                                  |
| S9                     | Tn6022a-24/Z1-2                | 1694                             |                                                  |
| S10                    | Z1-5/Tn6022a-1                 | 4087                             |                                                  |
| S11                    | Z1-11/ISAba1-out               | 4280                             |                                                  |
| S12                    | Tn6022a-5/Z2-2                 | 3306                             |                                                  |
| S13                    | Z2-1/Tn6022a-6                 | 3246                             |                                                  |
| S14                    | Tn6022a-9/Tn6022a-14           | 2342                             |                                                  |
| S15                    | Tn6022a-22/OXA-23-like-F       | 3420                             |                                                  |
| S16                    | OXA-23-like-R/Tn6022a-25       | 3445                             |                                                  |
| S17                    | Tn6022a-24/Z2-9                | 3460                             |                                                  |
| S18                    | Z2-8/Z2-14                     | 3618                             |                                                  |
| S19                    | Z2-13/comM-2                   | 4015                             |                                                  |
| S20                    | Tn6022a-24/comM-2              | 1415                             |                                                  |

<sup>a</sup> S, standard; L, long.

**TABLE S4.** Results of PCR-based detection of *aacA4-catB8-aadA1* and AbaR25 among the isolates<sup>a</sup>

| <b>Isolate</b> | <b>S1</b> | <b>S2, S3, S4</b> | <b>S5</b> | <b>S6</b> | <b>S7, S8, S9</b> | <b>S10, S11, S12, S13</b> | <b>S14, S15, S16</b> | <b>S17, S18, S19</b> | <b>S20</b> |
|----------------|-----------|-------------------|-----------|-----------|-------------------|---------------------------|----------------------|----------------------|------------|
| K51-65         | +         | +                 | -         | +         | +                 | +                         | +                    | +                    | +          |
| K51-66         | +         | +                 | -         | +         | +                 | +                         | +                    | +                    | +          |
| K51-67         | -         | ND                | -         | +         | -                 | -                         | +                    | -                    | +          |
| K51-68         | -         | ND                | -         | +         | +                 | +                         | +                    | +                    | +          |
| K51-69         | +         | +                 | -         | +         | +                 | +                         | +                    | +                    | +          |
| K51-70         | +         | +                 | -         | +         | +                 | +                         | +                    | +                    | +          |
| K51-71         | +         | +                 | -         | +         | +                 | +                         | +                    | +                    | +          |
| K51-72         | +         | +                 | -         | +         | +                 | +                         | +                    | +                    | +          |
| K51-73         | +         | +                 | -         | +         | +                 | +                         | +                    | +                    | +          |
| K51-74         | +         | +                 | -         | +         | +                 | -                         | +                    | +                    | +          |
| K51-75         | +         | +                 | -         | +         | +                 | +                         | +                    | +                    | +          |
| K51-76         | +         | +                 | -         | +         | +                 | +                         | +                    | +                    | +          |
| K51-77         | -         | ND                | -         | +         | +                 | +                         | +                    | +                    | +          |
| K51-78         | +         | +                 | -         | +         | +                 | +                         | +                    | +                    | +          |
| K51-79         | +         | +                 | -         | +         | +                 | +                         | +                    | +                    | +          |
| K51-80         | +         | +                 | -         | +         | +                 | +                         | +                    | +                    | +          |
| K51-81         | -         | ND                | -         | +         | +                 | +                         | +                    | +                    | +          |
| K70-64         | +         | +                 | -         | +         | +                 | +                         | +                    | +                    | +          |
| K70-65         | +         | +                 | -         | +         | +                 | +                         | +                    | +                    | +          |
| K70-66         | -         | ND                | -         | +         | +                 | +                         | +                    | +                    | +          |
| K70-67         | +         | +                 | -         | +         | +                 | +                         | +                    | +                    | +          |
| K70-68         | -         | ND                | -         | +         | +                 | +                         | +                    | +                    | +          |
| K70-69         | -         | ND                | -         | +         | +                 | +                         | +                    | +                    | +          |
| K70-70         | +         | +                 | -         | +         | +                 | +                         | +                    | +                    | +          |
| K70-71         | -         | ND                | -         | +         | +                 | +                         | +                    | +                    | +          |
| K70-72         | -         | ND                | -         | +         | +                 | +                         | +                    | +                    | +          |
| K70-73         | -         | ND                | -         | +         | +                 | +                         | +                    | +                    | +          |
| K70-74         | -         | ND                | -         | +         | +                 | +                         | +                    | +                    | +          |
| K70-75         | -         | ND                | -         | +         | +                 | +                         | +                    | +                    | +          |
| K70-76         | -         | ND                | -         | +         | +                 | +                         | +                    | +                    | +          |
| K70-77         | +         | +                 | -         | +         | +                 | +                         | +                    | +                    | +          |
| K70-78         | -         | ND                | -         | +         | +                 | +                         | +                    | +                    | +          |
| K70-79         | +         | +                 | -         | +         | +                 | +                         | +                    | +                    | +          |
| K70-80         | +         | +                 | -         | +         | +                 | +                         | +                    | +                    | +          |
| K70-81         | -         | ND                | -         | +         | +                 | +                         | +                    | +                    | +          |

<sup>a</sup> +, presence of the corresponding gene or genetic structure as listed in Table S3; -, interruption or absence of the corresponding gene or genetic structure as listed in Table S3; ND, not determined.
